# Supplementary material for: Layer guided-acoustic plate mode biosensors for monitoring MHC–peptide interactions
Source: Royal Society of Chemistry journal article supplement (doi:10.1039/b604812a), 2006-01-01
Supplement: b604812a.pdf [file b604812a.pdf]

## Layer Guided-Acoustic Plate Mode Biosensors for Monitoring

### MHC-peptide Interactions

S.M.Stanley, I.A.Dodi, C.R.Evans, S.J.Paston, R.C.Rees, C.J.Percival, G.McHale and  
M.I.Newton

#### Supplementary Information

To verify whether the binding was peptide specific, the experimental procedure was repeated with the last stage using a TPH epitope that binds only weakly with the MHC and no phase shift was observed in this case. Exemplar data is provided below in fig. 1 and fig. 2.

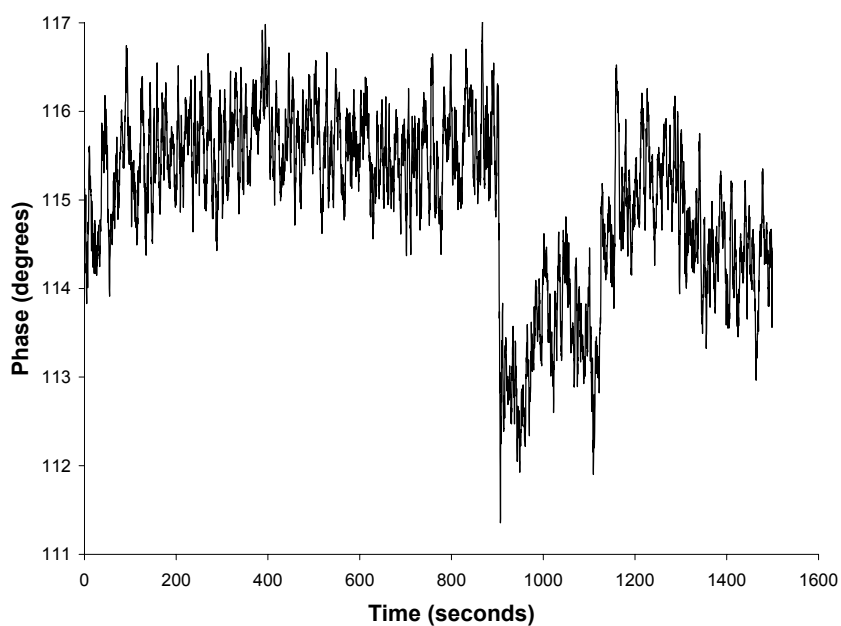

Figure 1 Change in phase as a result of the addition of  $\beta_2m$  at 893 seconds

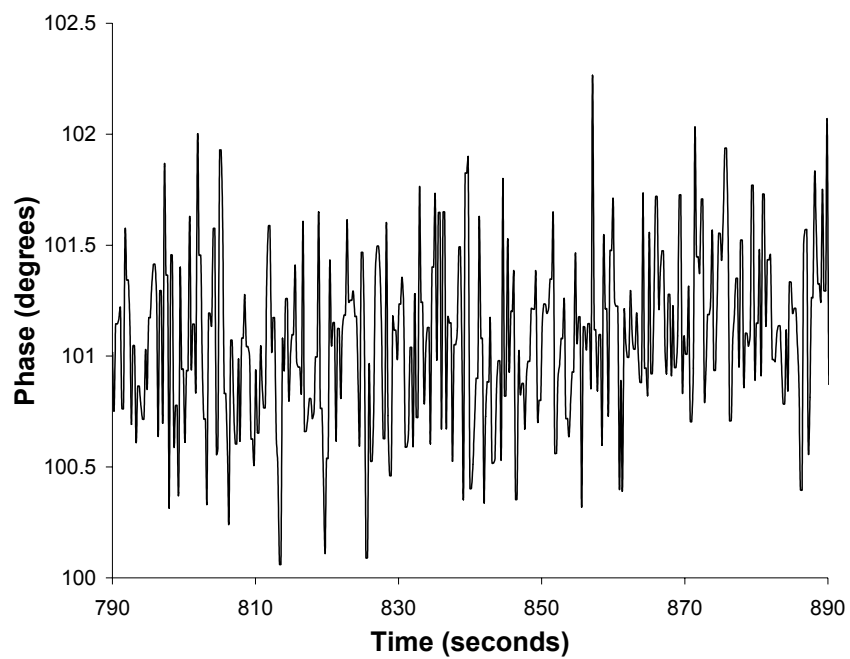

**Figure 2** Change in phase as a result of the addition of TPH epitope at 805 seconds
